# Supplementary material for: Setting-related influences on physical inactivity of older adults in residential care settings: a review
Source: BMC Geriatr. 2017 Apr 28;17:97. doi: 10.1186/s12877-017-0487-3 (PMC5408383; doi:10.1186/s12877-017-0487-3)
Supplement: Supplementary file 2 — "Study Characteristics of Included Studies on Residential-Care-Setting-Related Factors Related to Physical Inactivity of Aged Residents”. It includes the study characteristics of the included studies, including their assessed quality. (XLSX 16 kb) [file 12877_2017_487_MOESM2_ESM.xlsx]

## Sheet: Sheet1
Table 1 Study Characteristics of Included Studies on Residential-Care-Setting-Related Factors Related to Physical Inactivity of Aged Residents
Environmental factor	Author, year	Country	Study type	Methodologya	Setting	Number of residents	Gender residents	Age residents (M; SD; range)	Functional status residents	Quality (MMAT criteria)b
Physical environment	Chen, 2010	Taiwan	Qualitative	Interviews with residents	Six nursing homes	n = 90	34.4% male; 65.6% female	78.5; 6.2; 65-90	No regular participation in physical activities	***
	Joseph et al., 2006	U.S.	Mixed methods: Qualitative and Quantitative descriptive	Surveys completed by community managers and staff	398 multi care level providers, of which 75% continuing care retirement communities, and 25% housing providers	Average independently living: n = 157	Unknown	82; -; -	Unknown	*
						Average assisted living: n = 45		85; -; -
						Average nursing care: n = 82		86; -; -
	Lu et al., 2011	U.S. (Texas)	Qualitative	Focus group discussions with residents	Six assisted living facilities	n = 50 (n = 40 invited; n = 10 uninvited)	14% male; 86% female	84; -; 60-99	34% walked without any walking aid, 50% walked using an aid (44% walkers, 4% canes, 2% with support from a wheelchair), 4% used a wheelchair, and 12% used a mobility scooter	****
	Moos et al., 1984	U.S.?c	Quantitative descriptive	Observations, and an environmental assessment	Nursing home				Similar in both buildings: average functional ability	***
					First an old building	n = 98	95.9% male; 4.1% female	Mdn = 71; -; -	Walker/ wheelchair use by approximately 40%
					After the relocation a new building	Two months after the relocation: n = 115;
						Ten months after the relocation: n = 140	93% male; 7% female	68; -; -
	Pomeroy et al., 2011	U.S.	Quantitative non-randomized	For the person-environment fit score: interview of residents, and environmental assessment; For physical (in)activity outcomes: activity recording, and survey completed by primary caregiver; For functional ability: measure completed by caregiver	Total	n = 27	22.2% male; 77.8% female	87.4; 6.7; 74-100	Barthel Indexd: M = 64.5, SD = 28.2	**
					Welcome Home unitse (lower person-environment fit with regard to the indoor environment)	n = 16	25% male; 75% female	87.8; 7.6; -	Barthel Indexd: M = 59, SD = 25.2
					Traditional nursing home units (higher person-environment fit with regard to the indoor environment)	n = 11	18.2% male; 81.8% female	86.7; 5.2; -	Barthel Indexd: M = 73.6, SD = 32.2
Both physical environment and caregivers	Zegelin, 2008	Germany?c	Qualitative	Retrospective interviews with older adults	Old people’s homes, and domestic care	n = 32	41% male; 49% female	-; -; 62-98	Bedfast: the interviews were on the process towards the state of being bedfast, and all participants could have gotten up during this process	**
Caregivers	Bates-Jensen, Alessi, et al., 2004	U.S. (California)	Quantitative non-randomized	Observations, and interviews with residents (Nursing homes belonging to state's upper or lower quartile group based on MDS bedfast QI)	Total of 15 nursing homes	n = 439; (n = 188 for interviews)				**
					Eight nursing homes in the lower quartile of prevalence of bedridden residents	n = 207; (n = 90 for interviews)	28% male; 72% female	81; 14.6; -	MDS Transfer Scoref: M = 2.4, SD = 1.3; MDS Self performance of bed mobilityf: M = 1.4, SD = 1.5
					Seven nursing homes in the upper quartile of prevalence of bedridden residents	n = 232; (n = 98 for interviews)	25% male; 75% female	83; 10.3; -	MDS Transfer Scoref: M = 2.9, SD = 1.1; MDS Self performance of bed mobilityf: M = 2.6, SD = 1.4
	Bates-Jensen, Schnelle, et al., 2004	U.S. (California)	Quantitative non-randomized	Observations (Nursing homes belonging to high- or lower-staffed homes group based on state cost reports and interviews with nursing staff)	Total of 34 nursing homes	n = 882				***
					Six high-staffed homes	n = 136	11% male; 89% female	91; 6.04; -	MDS transfer level of assistance > 1f: 84%; bedridden according to MDS: 3%; ability to stand and bear weight: 48%
					28 lower-staffed homes	n = 746	32% male; 68% female	80; 13; -	MDS transfer level of assistance > 1f: 82%; bedridden according to MDS: 7%; ability to stand and bear weight: 35%
	Ericson-Lidman et al., 2015	Sweden	Qualitative	Interviews with relatives	Municipal residential care facility for older people	n = 6 relatives; n = 23 residents in the unit	Unknown	-; -; -	Substantial disabilities. Some residents could not walk, some residents were able to walk with assistanceg	*
	Häggström et al., 2007	Sweden?c	Qualitative	Interviews with relatives	10 special housing facilities	Unknown; n = 17 relatives	Unknown	-; -; - Aged ≥ 75	Unknown. They all had been admitted to emergency care	***
	Shore et al., 1995	U.S.?c	Quantitative descriptive	Observations	Community-based proprietary nursing home	n = 104	Unknown	80; -; 65-101	42.7% of the residents did not need much help from staff with ADL; 57.3% of the residents needed much or complete help from staff	**
Indefinite factor	Wadensten, 2007	Sweden	Qualitative	Interviews with residents	Two wards next to each other in a nursing home	n = 16	62.5% male; 37.5% female	-; -; 68-96	Different health states. All participants had diseases or physical disabilities	****
Note. M = mean; SD = standard deviation; Mdn = median; MMAT = Mixed Methods Appraisal Tool (Pluye et al., 2011); MDS = Minimum Data Set; QI = Quality Indicator; ADL = Activities of Daily Living
aOnly methodologies concerning measures being described in the results section of the present review are mentioned under this heading
bScores ranging from * = 25% to **** = 100%
cMost likely; uncertain from the article, based on country first author
dBarthel Index scores 0-100, with 100 being independent
eUnits that resemble home more than traditional nursing homes
fMDS scores 0-4, with 0 being independent and 4 total dependence
gThe latter information based on personal communication (E. Ericson-Lidman, personal communication, January 15, 2016)
